# Supplementary material for: Polydatin attenuates chronic alcohol consumption-induced cardiomyopathy through a SIRT6-dependent mechanism
Source: Royal Society of Chemistry journal article supplement (doi:10.1039/d2fo00966h), 2022-01-01
Supplement: d2fo00966h1.pdf [file d2fo00966h1.pdf]

## Supplementary Materials

### Polydatin attenuates chronic alcohol consumption-induced cardiomyopathy through a SIRT6-dependent mechanism

#### Authors:

Li-Ming Yu<sup>1†</sup>, Xue Dong<sup>2†</sup>, Ning Li<sup>1</sup>, Hui Jiang<sup>1</sup>, Ji-Kai Zhao<sup>1</sup>, Yin-Li Xu<sup>1</sup>, Deng-Yue Xu<sup>1</sup>, Xiao-Dong Xue<sup>1</sup>, Zi-Jun Zhou<sup>1</sup>, Yu-Ting Huang<sup>1</sup>, Qiu-Sheng Zhao<sup>1</sup>, Zhi-Shang Wang<sup>1</sup>, Zong-Tao Yin<sup>1\*</sup>, Hui-Shan Wang<sup>1\*</sup>

#### Author Affiliations:

<sup>1</sup>Department of Cardiovascular Surgery, General Hospital of Northern Theater Command, 83 Wenhua Road, Shenyang, Liaoning 110016, P. R. China

<sup>2</sup>The Third Outpatient Department, General Hospital of Northern Theater Command, 49 Beiling Road, Shenyang, Liaoning 110032, P. R. China

#### Author contributions

L.M.Y., Z.T.Y., H.J. and H.S.W. designed research; L.M.Y. performed research; L.M.Y. and X.D. analyzed data; N.L., H.J., L.M.Y. and X.D. wrote the paper. J.K.Z., Y.L.X., D.Y.X., X.D.X., Z.J.Z., Y.T.H., Q.S.Z., and Z.S.W. helped to perform experiments, analyze data and revise the paper.

#### Supplementary Table S1

**Table S1. Information of antibodies**

| <b>Target name</b>      | <b>Company</b> | <b>Catalog</b> |
|-------------------------|----------------|----------------|
| p-mTOR (Ser2448)        | CST            | 5536           |
| mTOR                    | CST            | 2983           |
| p-p70S6K (Thr389)       | CST            | 9205           |
| p70S6K                  | CST            | 9202           |
| p-S6RP (Ser235/236)     | CST            | 2211           |
| S6RP                    | CST            | 2317           |
| GAPDH                   | Santa Cruz     | sc-365062      |
| COL1A1                  | Santa Cruz     | sc-293182      |
| COL3A1                  | Santa Cruz     | sc-271249      |
| p-Drp-1 (Ser637)        | Abcam          | ab193216       |
| p-Drp-1 (Ser616)        | CST            | 3455           |
| Drp-1                   | CST            | 8570           |
| Fis1                    | Abcam          | ab71498        |
| Opa1                    | CST            | 80471          |
| Mfn1                    | Abcam          | ab126575       |
| Mfn2                    | CST            | 9482           |
| PINK                    | Santa Cruz     | sc-517353      |
| Parkin                  | CST            | 4211           |
| FUNDC1                  | CST            | 49240          |
| PHB2                    | CST            | 14085          |
| BNIP3                   | CST            | 3769           |
| SIRT6                   | CST            | 12486S         |
| p-AMPK (Thr172)         | CST            | 2535           |
| AMPK                    | CST            | 5831           |
| PGC1 $\alpha$           | Santa Cruz     | sc-13067       |
| p-Smad2 (Ser465/Ser467) | CST            | 18338          |
| Smad2                   | CST            | 5339           |
| p-Smad3 (Ser423/425)    | CST            | 9520           |
| Smad3                   | CST            | 9523           |
